# Supplementary material
Source: PubMed Central journal article supplement (PMC5444170)
Supplement: AAC.00443-17_zac006176247s1.pdf [file AAC.00443-17_zac006176247s1.pdf]

## Supplementary Figures

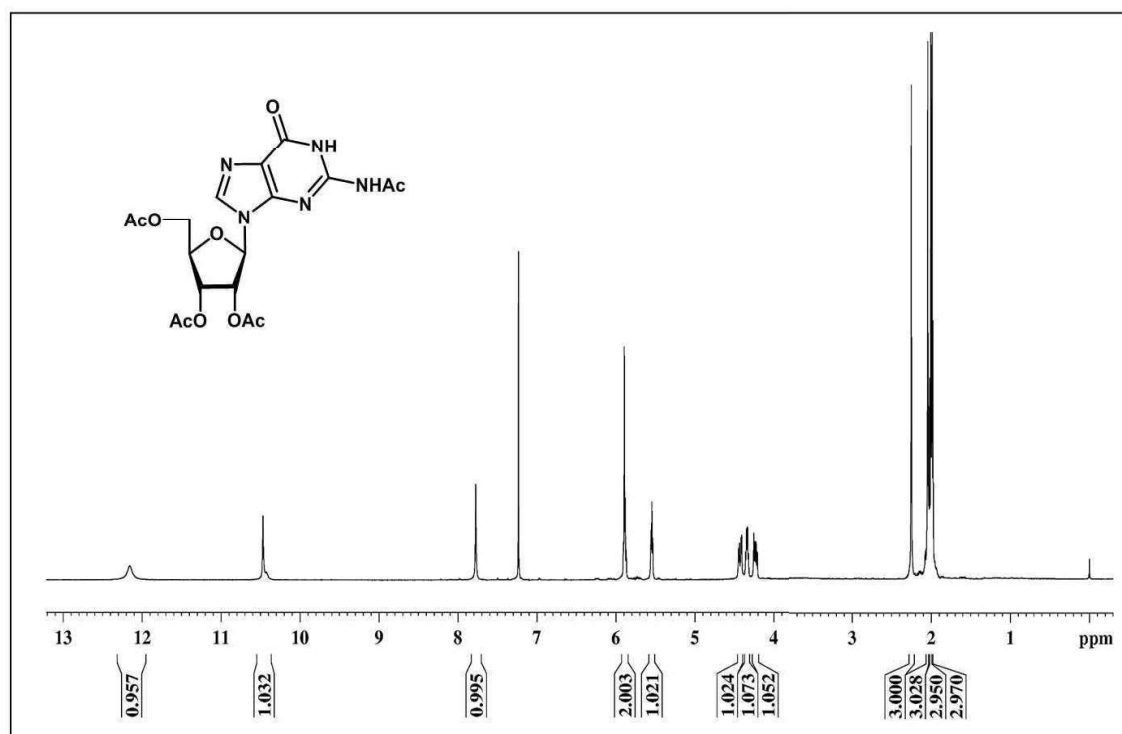

**Figure S1.**  $^1\text{H}$  NMR spectrum of **1** ( $\text{CDCl}_3$ , 400 MHz).

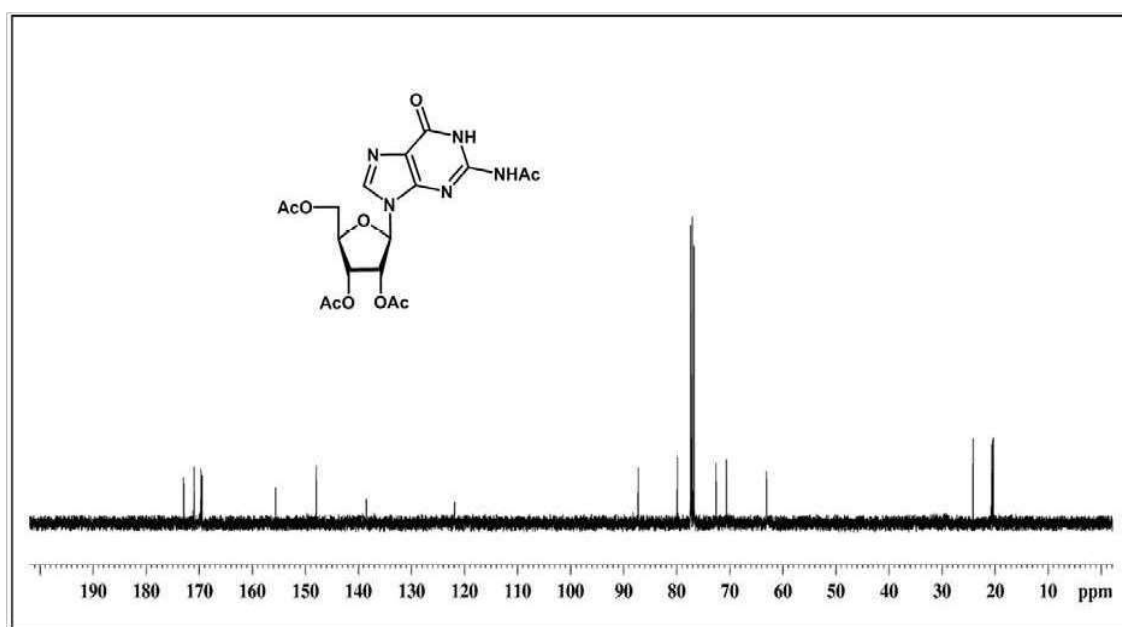

**Figure S2.**  $^{13}\text{C}$  NMR spectrum of **1** ( $\text{CDCl}_3$ , 100 MHz).

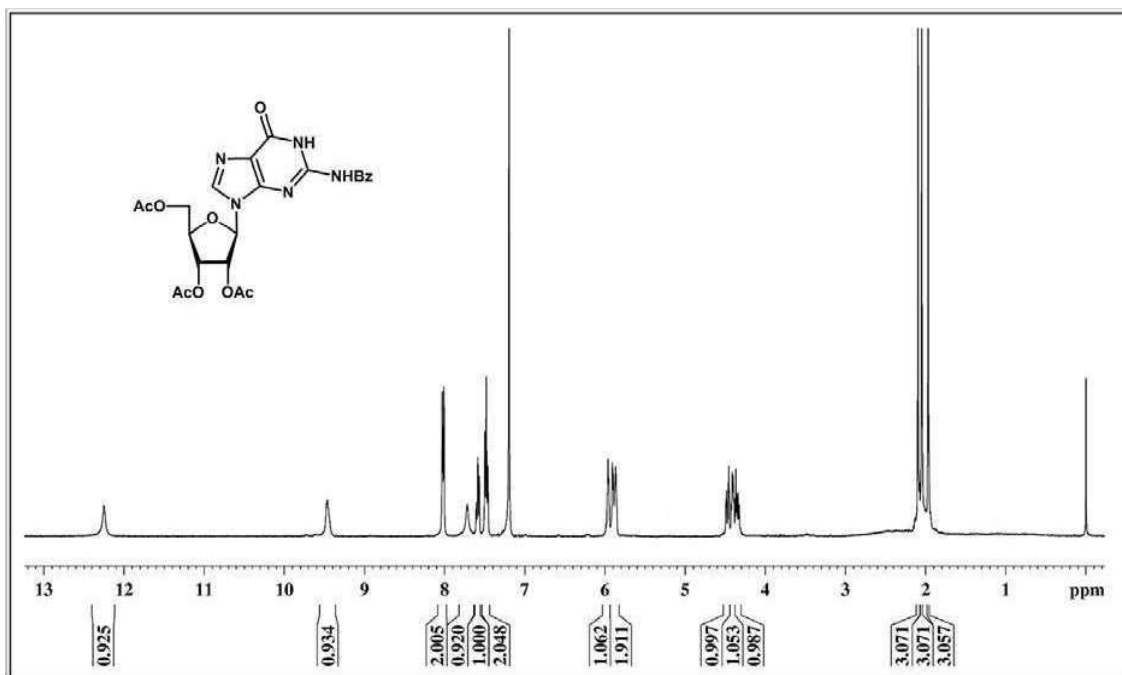

**Figure S3.**  $^1\text{H}$  NMR spectrum of **3** (CDCl<sub>3</sub>, 400 MHz).

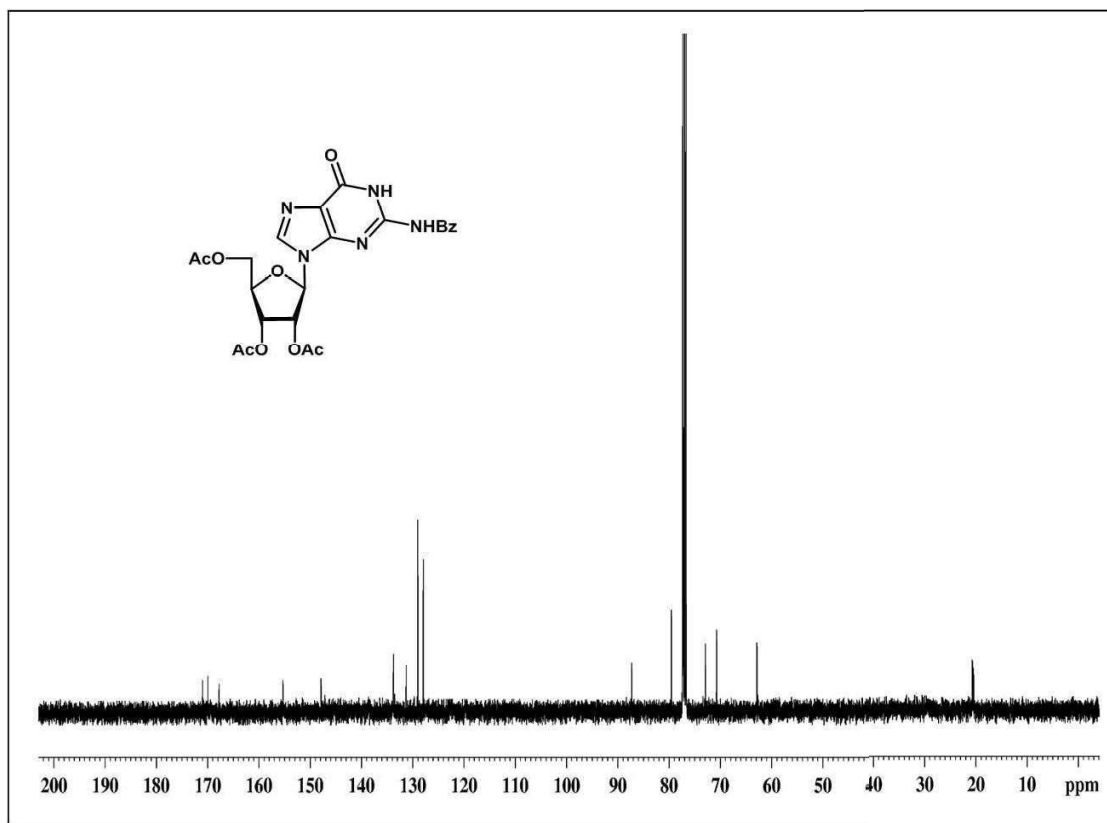

**Figure S4.**  $^{13}\text{C}$  NMR spectrum of **3** (CDCl<sub>3</sub>, 100 MHz).

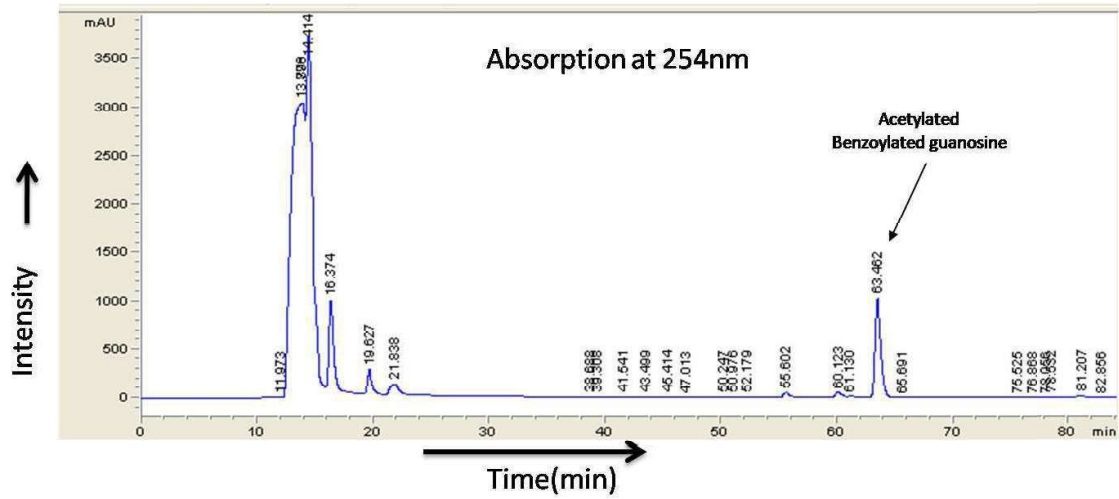

**Figure S5.** HPLC purification of acetylated benzoylated product. Peak at time point 63.462 minute contains the purified product.

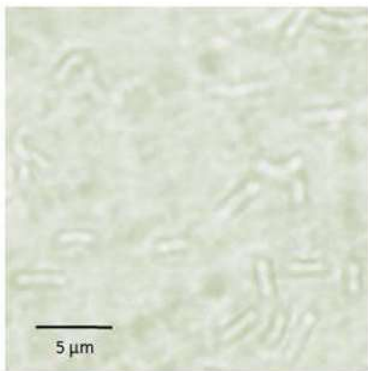

Untreated cells

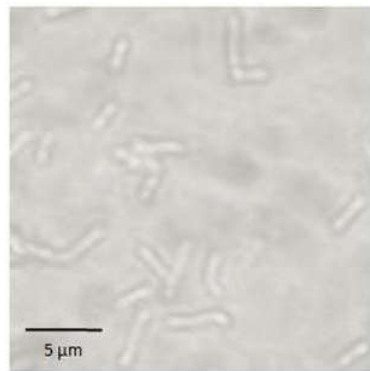

AB compound Treated Cells

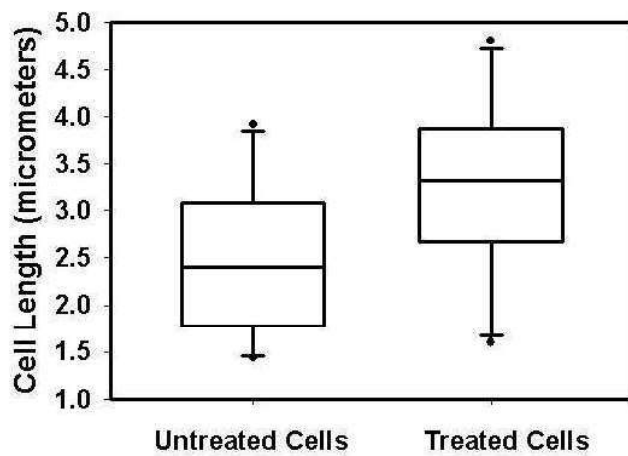

**Figure S6.** Bright field microscopy (100 X) of comparison of AB compound treated and untreated *M. smegmatis* cells. Cell length distribution analysis was performed using box plot. Lengths of at least 200 cells of each strain from different bright field micrographs were measured and plotted using the box plot analysis function from Sigmaplot 10.

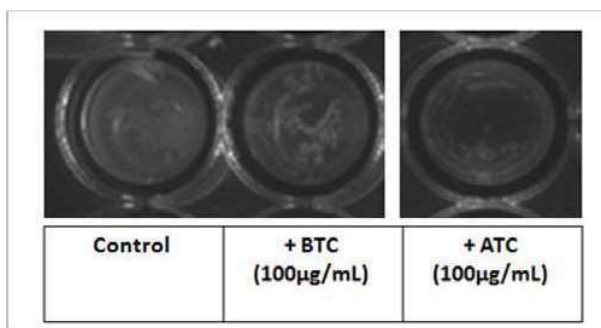

**Figure S7.** Biofilm morphology was assessed after 54 hours of addition of the compounds to the 72 hours old biofilm in comparison to the control.

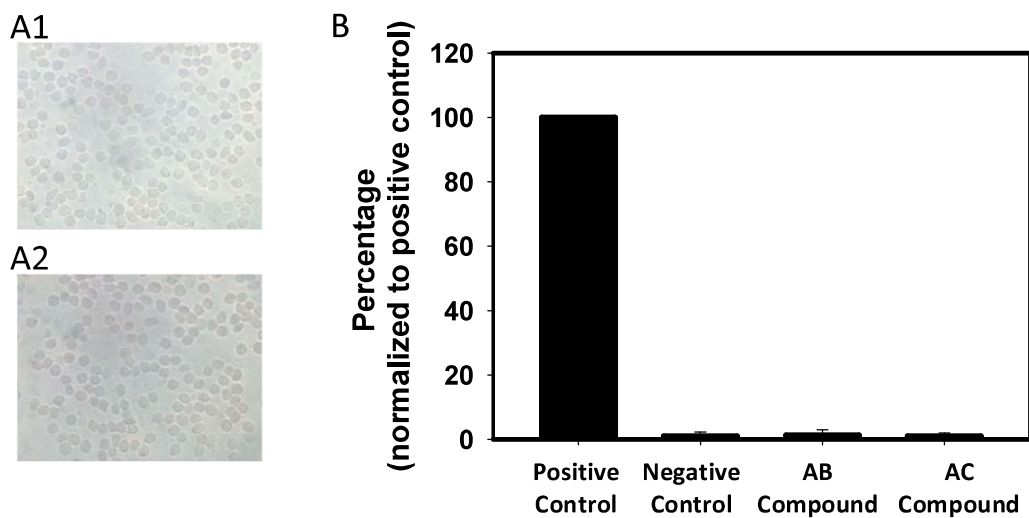

**Figure S8:** RBC toxicity Assay: Microscopic Analysis showing biconcave shape in A1) Control and A2) RBCs treated with AB compound. B) Percentage hydrolysis of RBC normalized to positive control which is taken as 100%
